# Supplementary material
Source: Springer Nature journal article supplement (https://www.springermedizin.de/resource/supplementary/12936_2008_605_MOESM4_ESM.pdf/9547810)
Supplement: MOESM4 [file 9547810]

(A)

0 2 2 3

0 1 2 4

0 2 2 1

0 0 0 1

0 2 1 2

0 1 1 4

0 2 2 1

etc

(B)

Allele[0][0][0] 0.100282 CI 0.053275 to 0.165301

Allele[0][0][1] 0.036462 CI 0.010825 to 0.083509

Allele[0][1][0] 0.000004 CI 0.000000 to 0.017582

Allele[0][1][1] 0.863227 CI 0.791573 to 0.918791

Allele[1][0][0] 0.000006 CI 0.000000 to 0.017584

Allele[1][0][1] 0.000009 CI 0.000000 to 0.017587

Allele[1][1][0] 0.000005 CI 0.000000 to 0.017583

Allele[1][1][1] 0.000005 CI 0.000000 to 0.017583
